# Supplementary material for: Regional anesthesia might reduce recurrence and metastasis rates in adult patients with cancers after surgery: a meta-analysis
Source: Springer Nature journal article supplement (doi:10.1186/s12871-023-02400-w), 2024-01-10
Supplement: MOESM2 [file 26614536]

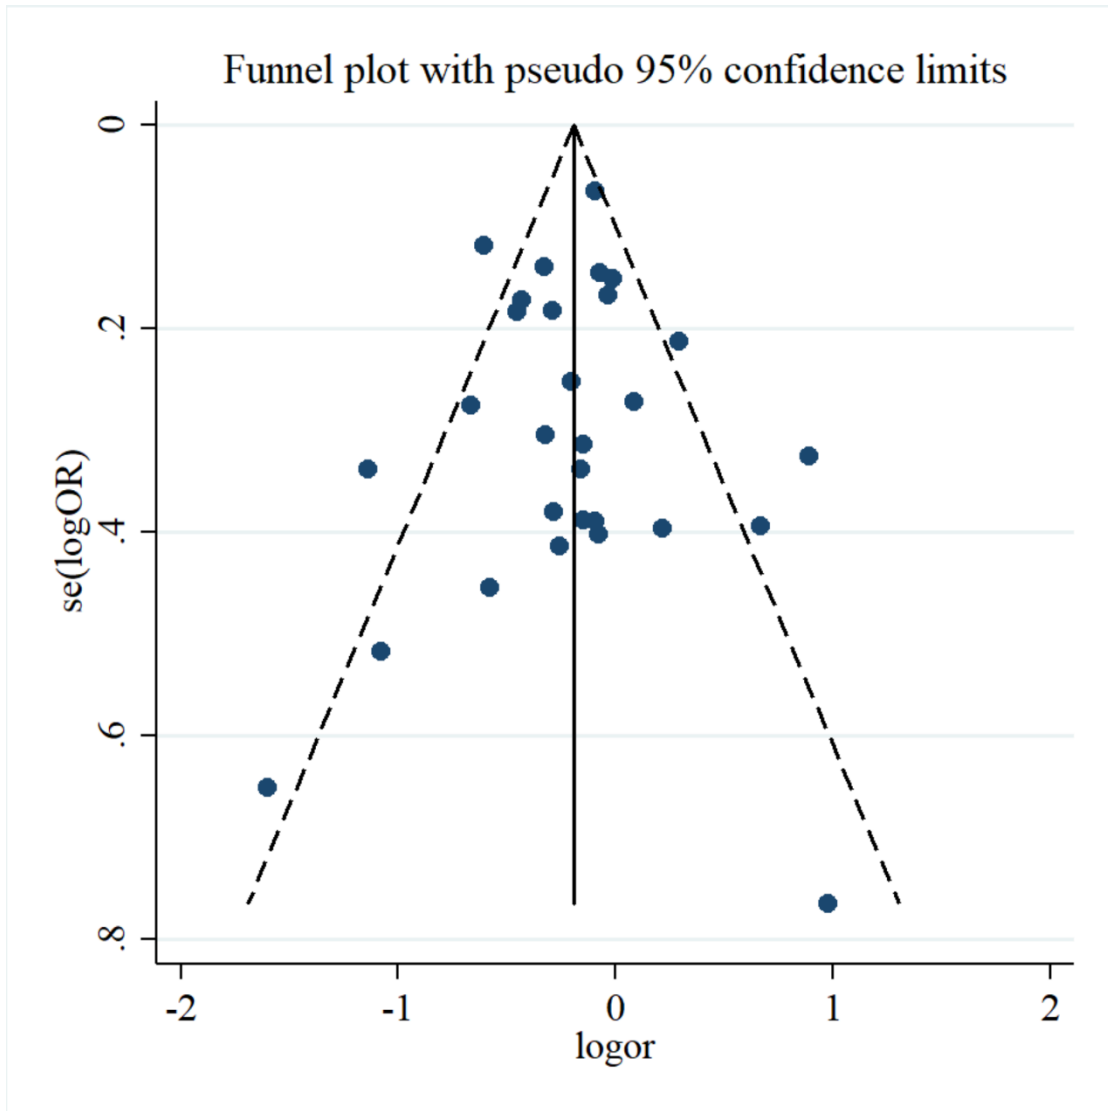

**S Figure 1.** Funnel plot for cancer recurrence.

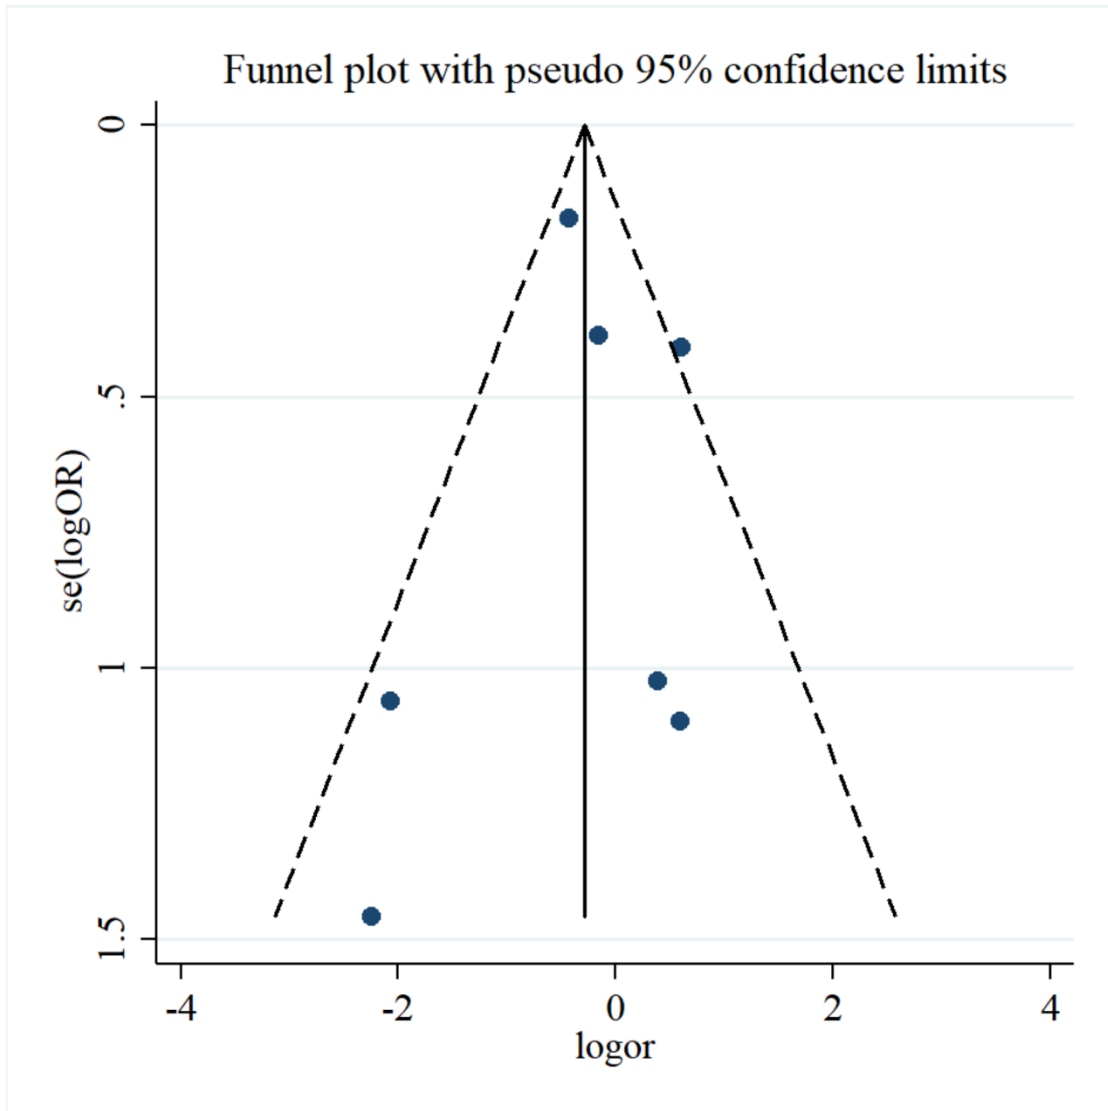

**S Figure 2.** Funnel plot for cancer local recurrence.

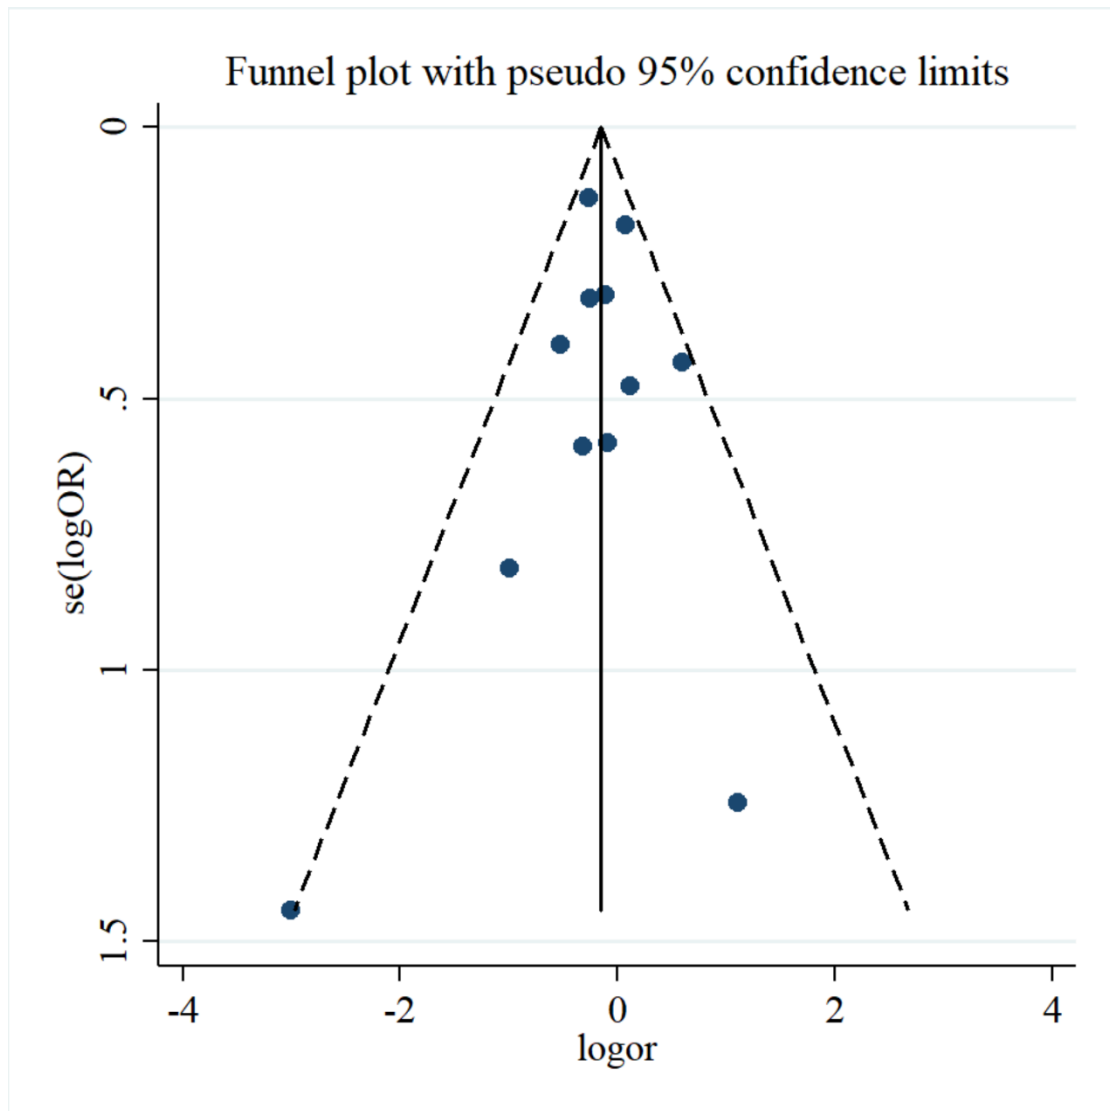

**S Figure 3.** Funnel plot for cancer metastasis.

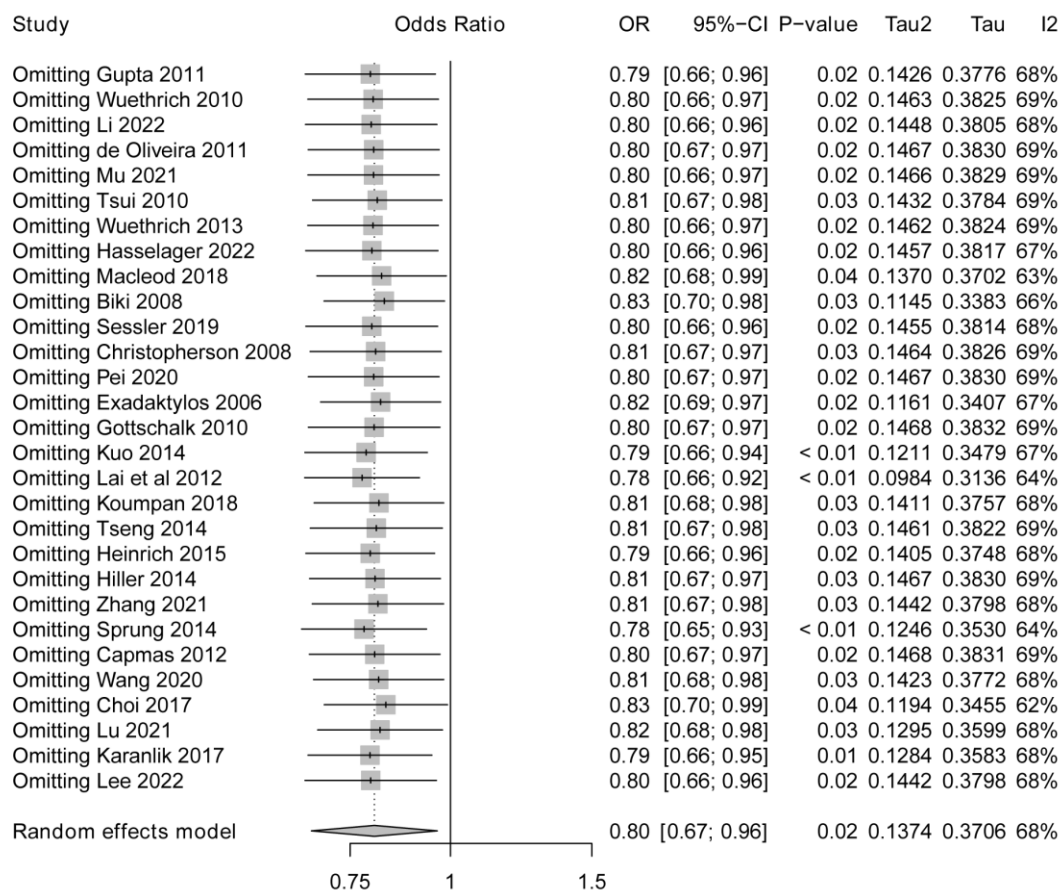

**S Figure 3** recurrence-sensitivity

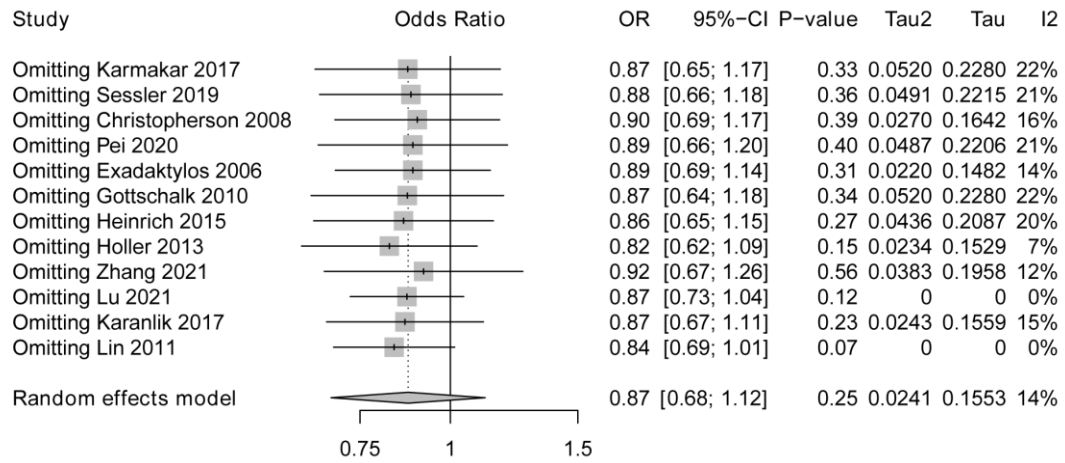

**S Figure 5** metastasis-sensitivity

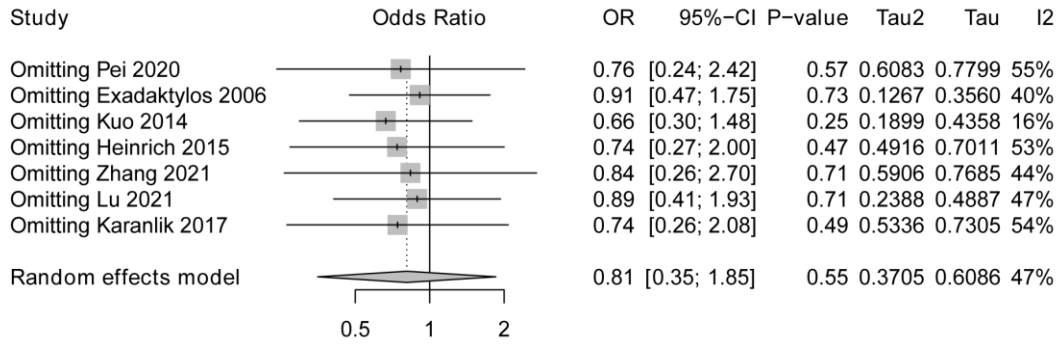

**S Figure 6** local\_recurrence-sensitivity

**Title:** Anesthesia type may impact on cancer recurrence and metastasis after cancer surgery: a meta-analysis

**Date:**2022-08-29

**PubMed**

|                     |           | <b>Search strategy</b>                                                                                                                                                                                                                                                                                                                                                                                                                                                                                 | <b>Numbers</b> |
|---------------------|-----------|--------------------------------------------------------------------------------------------------------------------------------------------------------------------------------------------------------------------------------------------------------------------------------------------------------------------------------------------------------------------------------------------------------------------------------------------------------------------------------------------------------|----------------|
| <b>Patient</b>      | <b>#1</b> | "Neoplasms"[Mesh]                                                                                                                                                                                                                                                                                                                                                                                                                                                                                      | 3723902        |
|                     | <b>#2</b> | ((((((((((((Cancer[Title/Abstract]) OR (carcinoma[Title/Abstract])) OR (Tumor[Title/Abstract])) OR (Neoplasm[Title/Abstract])) OR (Tumors[Title/Abstract])) OR (Neoplasia[Title/Abstract])) OR (Neoplasias[Title/Abstract])) OR (Cancers[Title/Abstract])) OR (Malignant Neoplasm[Title/Abstract])) OR (Malignancy[Title/Abstract])) OR (Malignancies[Title/Abstract])) OR (Malignant Neoplasms[Title/Abstract])) OR (Neoplasm, Malignant[Title/Abstract])) OR (Neoplasms, Malignant[Title/Abstract])) | 3448685        |
|                     | <b>#3</b> | <b>#1 OR #2</b>                                                                                                                                                                                                                                                                                                                                                                                                                                                                                        | 4728061        |
| <b>Intervention</b> | <b>#4</b> | "Anesthesia, Local"[Mesh]                                                                                                                                                                                                                                                                                                                                                                                                                                                                              | 18901          |
|                     | <b>#5</b> | esia, Regional[Title/Abstract])) OR (Anesthesia,Local[Title/Abstract])) OR (Anesthesia, Infiltration[Title/Abstract])) OR (Infiltration Anesthesia[Title/Abstract])) OR (Neural Therapy of Huneke[Title/Abstract])) OR (Huneke Neural Therapy[Title/Abstract])                                                                                                                                                                                                                                         | 185590         |
|                     | <b>#6</b> | <b>#4 OR #5</b>                                                                                                                                                                                                                                                                                                                                                                                                                                                                                        | 194141         |
| <b>Outcome</b>      | <b>#7</b> | (((((Recurrence [Title/Abstract]) OR (Metastasis[Title/Abstract])) OR (Lymph node metastasis[Title/Abstract])) OR (Survival analysis[Title/Abstract])) OR (Recurrence Free Survival[Title/Abstract])) OR (prognosis[Title/Abstract]))                                                                                                                                                                                                                                                                  | 1011091        |
|                     | <b>#8</b> | <b>#3 AND #6 AND #7</b>                                                                                                                                                                                                                                                                                                                                                                                                                                                                                | 2377           |

## Cochrane Library

| Cochrane            |           | Search strategy                                                                                                                                                                                                                                                                                                                                                                                                                                                             | Numbers |
|---------------------|-----------|-----------------------------------------------------------------------------------------------------------------------------------------------------------------------------------------------------------------------------------------------------------------------------------------------------------------------------------------------------------------------------------------------------------------------------------------------------------------------------|---------|
| <b>Patient</b>      | <b>#1</b> | MeSH descriptor: [Neoplasms] explode all trees                                                                                                                                                                                                                                                                                                                                                                                                                              | 89518   |
|                     | <b>#2</b> | (neoplasms):ti,ab,kw OR(Cancer):ti,ab,kw<br>OR(carcinoma):ti,ab,kw OR(Tumor):ti,ab,kw<br>OR(Neoplasm):ti,ab,kw OR(Tumors):ti,ab,kw<br>OR(Neoplasia):ti,ab,kw OR(Neoplasias):ti,ab,kw<br>OR(Cancers):ti,ab,kw OR(Malignant<br>Neoplasm):ti,ab,kw OR(Malignancy):ti,ab,kw<br>OR(Malignancies):ti,ab,kw OR(Malignant<br>Neoplasms):ti,ab,kw OR(Neoplasm,<br>Malignant):ti,ab,kw OR(Neoplasms,<br>Malignant):ti,ab,kw                                                           | 242025  |
|                     | <b>#3</b> | <b>#1 OR #2</b>                                                                                                                                                                                                                                                                                                                                                                                                                                                             | 252406  |
| <b>Intervention</b> | <b>#4</b> | MeSH descriptor: [Anesthesia, Local] explode all trees                                                                                                                                                                                                                                                                                                                                                                                                                      | 2285    |
|                     | <b>#5</b> | (Regional Anesthesia):ti,ab,kw OR(Local<br>Anesthesia):ti,ab,kw OR(Epidural Anesthesia):ti,ab,kw<br>OR(neuraxial anesthesia):ti,ab,kw OR(spinal<br>anesthesia):ti,ab,kw OR(Anesthetic<br>Technique):ti,ab,kw OR(Anesthesia):ti,ab,kw<br>OR(Anesthesia, Regional):ti,ab,kw<br>OR(Anesthesia,Local ):ti,ab,kw OR(Anesthesia,<br>Infiltration):ti,ab,kw OR(Infiltration<br>Anesthesia):ti,ab,kw OR(Neural Therapy of<br>Huneke):ti,ab,kw OR(Huneke Neural<br>Therapy):ti,ab,kw | 77929   |
|                     | <b>#6</b> | <b>#4 OR #5</b>                                                                                                                                                                                                                                                                                                                                                                                                                                                             | 77929   |
| <b>Outcome</b>      | <b>#7</b> | (Recurrence):ti,ab,kw OR (Metastasis):ti,ab,kw OR<br>(Lymph node metastasis):ti,ab,kw OR (Survival<br>analysis):ti,ab,kw OR (Recurrence Free<br>Survival):ti,ab,kw OR (prognosis):ti,ab,kw                                                                                                                                                                                                                                                                                  | 138637  |
| <b>P+I+O</b>        | <b>#8</b> | <b>#3 AND #7</b>                                                                                                                                                                                                                                                                                                                                                                                                                                                            | 568     |

## Embase



|                     |           | <b>Search strategy</b>                                                                                                                                                                                                                                                                                                                                                                                             | <b>Numbers</b> |
|---------------------|-----------|--------------------------------------------------------------------------------------------------------------------------------------------------------------------------------------------------------------------------------------------------------------------------------------------------------------------------------------------------------------------------------------------------------------------|----------------|
| <b>Patient</b>      | <b>#1</b> | 'neoplasm'/exp                                                                                                                                                                                                                                                                                                                                                                                                     | 5718353        |
|                     | <b>#2</b> | 'neoplasms':ab,ti or 'Cancer':ab,ti or 'carcinoma':ab,ti or 'Tumor':ab,ti or 'Neoplasm':ab,ti or 'Tumors':ab,ti or 'Neoplasia':ab,ti or 'Neoplasias':ab,ti or 'Cancers':ab,ti or 'Malignant Neoplasm':ab,ti or 'Malignancy':ab,ti or 'Malignancies':ab,ti or 'Malignant Neoplasms':ab,ti or 'Neoplasm, Malignant':ab,ti or 'Neoplasms, Malignant':ab,ti                                                            | 473108         |
|                     | <b>#3</b> | <b>#1 OR #2</b>                                                                                                                                                                                                                                                                                                                                                                                                    | 6577582        |
| <b>Intervention</b> | <b>#4</b> | 'local anesthesia'/exp                                                                                                                                                                                                                                                                                                                                                                                             | 46438          |
|                     | <b>#5</b> | 'Regional Anesthesia':ab,ti or 'Local Anesthesia':ab,ti or 'Epidural Anesthesia':ab,ti or 'neuraxial anesthesia':ab,ti or 'spinal anesthesia':ab,ti or 'Anesthetic Technique':ab,ti or 'Anesthesia':ab,ti or 'Anesthesia, Regional':ab,ti or 'Anesthesia,Local ':ab,ti or 'Anesthesia, Infiltration':ab,ti or 'Infiltration Anesthesia':ab,ti or 'Neural Therapy of Huneke':ab,ti or 'Huneke Neural Therapy':ab,ti | 233960         |
|                     | <b>#6</b> | <b>#4 OR #5</b>                                                                                                                                                                                                                                                                                                                                                                                                    | 260571         |
| <b>Outcome</b>      | <b>#7</b> | 'Recurrence':ab,ti or 'Metastasis':ab,ti or 'Lymph node metastasis':ab,ti or 'Survival analysis':ab,ti or 'Recurrence Free Survival':ab,ti or 'prognosis':ab,ti                                                                                                                                                                                                                                                    | 1452933        |
| <b>P+I+O</b>        | <b>#8</b> | <b>#3 AND #6 AND #7</b>                                                                                                                                                                                                                                                                                                                                                                                            | 4425           |

**Supplementary Table 2 Quality assessment of included studies by NOS**

| Study            | 1 | 2 | 3 | 4 | 5 | 6 | 7 | 8 | Total |
|------------------|---|---|---|---|---|---|---|---|-------|
| Lee 2022         | 1 | 1 | 1 | 1 | 2 | 1 | 0 | 0 | 7     |
| Lin 2011         | 0 | 1 | 1 | 1 | 1 | 1 | 1 | 0 | 6     |
| Karanlik 2017    | 1 | 0 | 0 | 1 | 1 | 1 | 1 | 0 | 5     |
| Lu 2021          | 0 | 1 | 1 | 1 | 2 | 1 | 1 | 1 | 8     |
| Choi 2017        | 1 | 1 | 1 | 1 | 1 | 1 | 1 | 0 | 7     |
| Wang 2020        | 1 | 1 | 1 | 1 | 2 | 1 | 0 | 0 | 7     |
| Capmas 2012      | 0 | 1 | 1 | 1 | 1 | 1 | 0 | 1 | 6     |
| Sprung 2014      | 1 | 1 | 1 | 1 | 2 | 1 | 1 | 1 | 9     |
| Zhang 2021       | 1 | 1 | 1 | 1 | 2 | 1 | 1 | 1 | 9     |
| Holler 2013      | 1 | 1 | 1 | 1 | 0 | 1 | 1 | 0 | 7     |
| Hiller 2014      | 0 | 1 | 1 | 1 | 2 | 1 | 0 | 1 | 7     |
| Heinrich 2015    | 0 | 1 | 1 | 1 | 2 | 1 | 1 | 0 | 7     |
| Tseng 2014       | 1 | 1 | 1 | 1 | 2 | 1 | 1 | 1 | 9     |
| Koumpan 2017     | 0 | 1 | 1 | 1 | 0 | 1 | 1 | 0 | 5     |
| Lai 2011         | 0 | 1 | 1 | 1 | 2 | 1 | 1 | 0 | 7     |
| Kuo 2014         | 0 | 1 | 1 | 1 | 2 | 1 | 0 | 1 | 7     |
| Gottschalk 2010  | 1 | 1 | 1 | 1 | 1 | 1 | 1 | 0 | 7     |
| Exadaktylos 2006 | 0 | 1 | 1 | 1 | 2 | 1 | 0 | 1 | 7     |
| Pei 2020         | 0 | 1 | 1 | 1 | 2 | 1 | 0 | 1 | 7     |
| Biki 2008        | 0 | 1 | 1 | 1 | 1 | 1 | 1 | 0 | 6     |
| Macleod 2018     | 1 | 1 | 1 | 1 | 1 | 1 | 1 | 0 | 7     |
| Hasselager 2022  | 1 | 1 | 1 | 1 | 0 | 1 | 1 | 0 | 6     |
| Wuethrich 2013   | 0 | 1 | 1 | 1 | 2 | 1 | 1 | 0 | 7     |
| Mu 2021          | 0 | 1 | 1 | 1 | 2 | 1 | 0 | 1 | 7     |
| de Oliveira 2011 | 0 | 1 | 1 | 1 | 2 | 1 | 1 | 0 | 7     |
| Wuethrich 2010   | 1 | 1 | 1 | 1 | 1 | 1 | 1 | 0 | 7     |
| Gupta 2011       | 1 | 1 | 1 | 1 | 1 | 1 | 0 | 0 | 6     |

Cohort study: 1. Representativeness of the exposed cohort; 2. Selection of the non-exposed cohort; 3. Ascertainment of exposure; 4. Demonstration that outcome of interest was not present at start of study. 5. Comparability of cohorts on the basis of the design analysis; 6. Assessment of outcomes; 7. Was follow-up long enough for outcomes to occur; 8. Adequacy of follow-up of cohorts.

Case-control study: 1. Is the case definition adequate? 2. Representativeness of the cases; 3. Selection of Controls; 4. Definition of Controls; 5. Comparability of cases and controls on the basis of the design or analysis; 6. Ascertainment of exposure; 7. Same method of ascertainment for cases and controls; 8. non-Response rate.

**Supplementary table3 Quality assessment of included studies by ROB 2.0**

| Study              | Randomizati<br>on process | Deviations<br>from<br>intended<br>interventions | Missing<br>outcomes<br>data | Measurement<br>of the<br>outcome | Selection of<br>the reported<br>results | Overall bias |
|--------------------|---------------------------|-------------------------------------------------|-----------------------------|----------------------------------|-----------------------------------------|--------------|
| Li, 2022           | Some<br>concerns          | Low                                             | Low                         | Low                              | Low                                     | Low          |
| Tsui,2010          | Low                       | Low                                             | Some<br>concerns            | Low                              | Low                                     | Low          |
| Karmarkar,2017     | Low                       | Low                                             | Some<br>concerns            | Low                              | Low                                     | Low          |
| Seller,2019        | Some<br>concerns          | Low                                             | Some<br>concerns            | Low                              | Low                                     | Low          |
| Chistopherson,2008 | Some<br>concerns          | High                                            | High                        | Low                              | Low                                     | High         |

|                      | Randomization process | Deviations from intended interventions | Missing outcome data | Measurement of the outcome | Selection of the reported result | Overall Bias |
|----------------------|-----------------------|----------------------------------------|----------------------|----------------------------|----------------------------------|--------------|
| Li, 2022             | ?                     | +                                      | +                    | +                          | +                                | +            |
| Tsui, 2010           | +                     | +                                      | ?                    | +                          | +                                | +            |
| Karmakar, 2017       | +                     | +                                      | ?                    | +                          | +                                | +            |
| Sessler, 2019        | ?                     | +                                      | ?                    | +                          | +                                | +            |
| Christopherson, 2008 | ?                     | -                                      | -                    | +                          | +                                | -            |

- + Low risk
- ? Some concerns
- High risk
